# Supplementary material for: Fear, Efficacy, and Environmental Health Risk Reporting: Complex Responses to Water Quality Test Results in Low-Income Communities
Source: MDPI journal article supplement (doi:10.3390/ijerph19010597), 2022-01-05
Supplement: s1 [file s1]

Supplementary Table S1: Integrated fear appeal framework concepts assessed through LWM surveys.

| Survey                 | Description                                                                                                                                                                                                                                                                                                                                                                                                                                                    | Baseline Awareness | Perceived Threat | Perceived Efficacy | Affective State* | Intentions | Actions | Defensive Response |
|------------------------|----------------------------------------------------------------------------------------------------------------------------------------------------------------------------------------------------------------------------------------------------------------------------------------------------------------------------------------------------------------------------------------------------------------------------------------------------------------|--------------------|------------------|--------------------|------------------|------------|---------|--------------------|
| (1) before monitoring  | Assessed perceptions of water safety prior to commencing monitoring, it included questions on water use, efforts to manage water cleanliness, and prior exposure to water quality testing or water safety information.                                                                                                                                                                                                                                         | X                  | X                | X                  |                  |            |         | X                  |
| (2) after first report | Conducted immediately following the first sharing of <i>E. coli</i> results, it focused on capturing the LWMs' affective and cognitive responses to the information.                                                                                                                                                                                                                                                                                           |                    | X                | X                  | X                | X          |         | X                  |
| (3) monthly check-ins  | Recorded observations and conversations from site visits and results-reporting with attention to affect display, stated intentions, questions, and actions of the LWMs in response to the monitoring results. Each sharing of results brings the LWM back to the message processing (undecided) stage and the short-term outcomes are a) stay undecided, b) no decision and move to uninvolved, c) intend to act (or continue acting), or d) intend no action. |                    | X                | X                  | X                | X          | X       | X                  |
| (4) end of 2019        | Conducted after the final reporting for 2019. LWMs were invited to reflect on the set of results, the utility of monitoring, and their experience with implementing water safety measures, where relevant.                                                                                                                                                                                                                                                     |                    | X                | X                  |                  | X          | X       | X                  |
| (5) mid-2020           | Supplies that were registered for maintenance services in 2020 continued to be monitored quarterly and a final survey of perceptions and intentions was conducted mid-year.                                                                                                                                                                                                                                                                                    |                    | X                | X                  | X                | X          | X       | X                  |

\* measured by affect display

**Supplementary Table S2:** Percentages of LWMs reporting water safety intentions and actions at least once.

| Approach              | Activity                        | CBM      |       | Facility |       | Private  |       |
|-----------------------|---------------------------------|----------|-------|----------|-------|----------|-------|
|                       |                                 | Intended | Acted | Intended | Acted | Intended | Acted |
| Taking direct action  | Treat water                     | 25       | 11    | 87       | 60    | 50       | 17    |
|                       | Clean tank(s)                   | 39       | 18    | 53       | 40    | 0        | 0     |
|                       | Install fencing                 | 36       | 25    | 7        | 7     | 33       | 17    |
|                       | Other source protection         | 18       | 14    | 27       | 20    | 50       | 33    |
|                       | Implement source switching      | 0        | 0     | 40       | 33    | 0        | 0     |
| Requesting support    | Seek government support         | 18       | 11    | 7        | 7     | 0        | 0     |
|                       | Seek NGO support                | 0        | 0     | 40       | 27    | 0        | 0     |
|                       | Inform activism                 | 4        | 0     | 0        | 0     | 0        | 0     |
| Advising users to act | Instruct source protection      | 18       | 7     | 20       | 20    | 33       | 17    |
|                       | Instruct HHWT                   | 46       | 25    | 7        | 0     | 50       | 33    |
|                       | Instruct source switching       | 0        | 0     | 7        | 7     | 0        | 0     |
|                       | Instruct HHWT for other sources | 18       | 11    | 40       | 20    | 17       | 17    |
| Any                   | All                             | 82       | 71    | 93       | 87    | 67       | 67    |

**Supplementary Table S3:** Defensive responses indicated at least once by LWMs following monitoring reporting.

| <b>Defensive response</b> | <b>Description of expression.</b>                                                                                                                                                                                                                                                                                              | <b>No. of LWMs</b> |
|---------------------------|--------------------------------------------------------------------------------------------------------------------------------------------------------------------------------------------------------------------------------------------------------------------------------------------------------------------------------|--------------------|
| Downward comparison       | Contextualising the reported monitoring results with reference to less protected drinking-water sources and other more severe threats.                                                                                                                                                                                         | 21                 |
| Fatalism                  | Expressed by statements indicating that microbial contamination is natural or God's will, and is outside of the LWM's responsibility and ability to control.                                                                                                                                                                   | 11                 |
| Resignation               | Indicated by statements of patience and waiting for efficacy to change through receipt of external support.                                                                                                                                                                                                                    | 11                 |
| Reframing                 | Used for justification of inaction, for example by framing <i>E. coli</i> presence as a consequence of short-term, anomalous events like breakdown repairs.                                                                                                                                                                    | 10                 |
| Denial                    | Expressed by characterising test results as false alarms and presenting reasons why they may not be reliable, including no consequent cases of illness or no convincing pathway for <i>E. coli</i> ingress into the system.                                                                                                    | 8                  |
| Avoidance                 | One LWM withdrew permission for sampling to continue into 2020. Six other LWMs indicated avoidance by a combination of purposefully not sharing results with other committee members or administrators, low responsiveness to phone calls and meeting requests, and voicing that test results without solutions are unhelpful. | 7                  |
